# Supplementary material for: A multimodal intervention to improve hand hygiene compliance in peripheral wards of a tertiary care university centre: a cluster randomised controlled trial
Source: PubMed Central journal article supplement (PMC7368705; doi:10.1186/s13756-020-00776-9), 2020-07-18
Supplement: 13756_2020_776_MOESM1_ESM.pdf [file 13756_2020_776_MOESM1_ESM.pdf]

**A multimodal intervention to improve hand hygiene compliance in peripheral wards of a tertiary care university centre: a cluster randomised controlled trial**

**Supplementary material**

**Table S1** Structural characteristics of wards by study group

| <b>Parameter</b>                  |                                 | <b>Intervention group</b> | <b>Control group</b> | <b>Total</b> |
|-----------------------------------|---------------------------------|---------------------------|----------------------|--------------|
| Number of wards (total)           |                                 | 10                        | 10                   | 20           |
| Number of medical wards           |                                 | 9                         | 7                    | 16           |
|                                   | Hematology/Oncology             | 2                         | 3                    | 5            |
|                                   | Cardiology                      | 1                         | 1                    | 2            |
|                                   | Gastroenterology/<br>Nephrology | 1                         | 3                    | 4            |
|                                   | Neurology                       | 2                         | 0                    | 2            |
|                                   | Mixed/Other                     | 3                         | 0                    | 3            |
| Number of surgical wards          |                                 | 1                         | 2                    | 3            |
|                                   | Abdominal surgery               | 1                         | 0                    | 1            |
|                                   | Traumatology                    | 0                         | 1                    | 1            |
|                                   | Gynecology/Urology              | 0                         | 1                    | 1            |
| Number of interdisciplinary wards |                                 | 0                         | 1                    | 1            |
| Patient-days in the year 2018     | Median                          | 10545                     | 10283                | 10928        |
|                                   | (Interquartile range)           | (8814-14771)              | (8425-15143)         | (8814-15143) |

**Table S2** Hand hygiene (HH) opportunities and actions per WHO-moment, profession and aseptic procedure by study group and by study period

|                                                               | Baseline period (cycle 1)                                              |                 | Intervention period (cycle 2-5) |                 |
|---------------------------------------------------------------|------------------------------------------------------------------------|-----------------|---------------------------------|-----------------|
|                                                               | Intervention group                                                     | Control group   | Intervention group              | Control group   |
| <b>WHO-moment</b>                                             | <b>Number of HH-opportunities; Number of HH-actions; HH-compliance</b> |                 |                                 |                 |
| <b>All</b>                                                    | 2494; 1482; 59%                                                        | 2484; 1457; 59% | 8215; 5033; 61%                 | 8231; 4948; 60% |
| <b>1 – before touching a patient</b>                          | 698; 393; 56%                                                          | 658; 352; 53%   | 2346; 1408; 60%                 | 2130; 1201; 56% |
| <b>2 – before clean or aseptic procedure</b>                  | 380; 168; 44%                                                          | 426; 193; 45%   | 1452; 764; 53%                  | 1738; 905; 52%  |
| <b>3 – after body fluid exposure risk</b>                     | 171; 114; 67%                                                          | 241; 145; 60%   | 527; 333; 63%                   | 705; 482; 68%   |
| <b>4 – after touching a patient</b>                           | 791; 563; 71%                                                          | 668; 499; 75%   | 2496; 1774; 71%                 | 2414; 1685; 70% |
| <b>5 – after touching patient surroundings</b>                | 454; 244; 54%                                                          | 491; 268; 55%   | 1394; 754; 54%                  | 1244; 675; 54%  |
| <b>Profession</b>                                             | <b>Number of HH-opportunities; Number of HH-actions; HH-compliance</b> |                 |                                 |                 |
| <b>All</b>                                                    | 2494; 1482; 59%                                                        | 2484; 1457; 59% | 8215; 5033; 61%                 | 8231; 4948; 60% |
| <b>Nurses</b>                                                 | 1385; 838; 61%                                                         | 1683; 992; 59%  | 5269; 3281; 62%                 | 5459; 3374; 62% |
| <b>Physicians</b>                                             | 767; 523; 68%                                                          | 641; 393; 61%   | 1887; 1232; 65%                 | 2234; 1327; 59% |
| <b>Others</b>                                                 | 342; 121; 35%                                                          | 160; 72; 45%    | 1059; 520; 49%                  | 538; 247; 46%   |
| <b>Aseptic procedure</b>                                      | <b>Number of HH-opportunities; Number of HH-actions; HH-compliance</b> |                 |                                 |                 |
| <b>All</b>                                                    | 380; 168; 44%                                                          | 426; 193; 45%   | 1452; 764; 53%                  | 1738; 905; 52%  |
| <b>Preparation of intravenous medication</b>                  | 51; 29; 57%                                                            | 65; 27; 42%     | 274; 161; 59%                   | 285; 189; 66%   |
| <b>Intravascular catheter manipulation</b>                    | 130; 58; 45%                                                           | 196; 100; 51%   | 496; 271; 55%                   | 691; 380; 55%   |
| <b>Insertion of intravascular catheter</b>                    | 78; 31; 40%                                                            | 83; 31; 37%     | 405; 173; 43%                   | 383; 164; 43%   |
| <b>(Wound-) Dressing change/<br/>Manipulation of drainage</b> | 41; 22; 54%                                                            | 62; 26; 42%     | 112; 65; 58%                    | 213; 86; 40%    |
| <b>Contact with mucous membrane</b>                           | 30; 14; 47%                                                            | 18; 8; 44%      | 139; 79; 57%                    | 148; 75; 51%    |
| <b>Not specified</b>                                          | 50; 14; 28%                                                            | 2; 1; 50%       | 26; 15; 58%                     | 18; 11; 61%     |

**Table S3** Positive blood cultures stratified by pathogen per 1,000 patient-days by study group and by study period

| Study group  | Pathogen/pathogen-group          | Baseline period    |                                    | Intervention period |                                    | Follow-up period   |                                    | Comparison                                    |                                            |                                                |
|--------------|----------------------------------|--------------------|------------------------------------|---------------------|------------------------------------|--------------------|------------------------------------|-----------------------------------------------|--------------------------------------------|------------------------------------------------|
|              |                                  | Number of isolates | Mean rate/1000 patient-days (CI95) | Number of isolates  | Mean rate/1000 patient-days (CI95) | Number of isolates | Mean rate/1000 patient-days (CI95) | IRR (CI95), p-value Intervention vs. Baseline | IRR (CI95), p-value Follow-up vs. Baseline | IRR (CI95), p-value Follow-up vs. Intervention |
| Intervention | All                              | 161                | 1.42<br>(1.21, 1.66)               | 172                 | 1.46<br>(1.25, 1.70)               | 53                 | 1.79<br>(1.34, 2.34)               | 1.03 (0.83, 1.27),<br>0.80                    | 1.26 (0.92, 1.71),<br>0.15                 | 1.23 (0.89, 1.66),<br>0.20                     |
|              | Coagulase-negative staphylococci | 24                 | 0.21<br>(0.14, 0.32)               | 32                  | 0.27<br>(0.19, 0.38)               | 10                 | 0.34<br>(0.16, 0.62)               | 1.28 (0.76, 2.20),<br>0.36                    | 1.61 (0.73, 3.28),<br>0.23                 | 1.25 (0.58, 2.47),<br>0.54                     |
|              | <i>Staphylococcus aureus</i>     | 31                 | 0.27<br>(0.19, 0.39)               | 30                  | 0.26<br>(0.17, 0.36)               | 4                  | 0.14<br>(0.04, 0.35)               | 0.93 (0.56, 1.54),<br>0.78                    | 0.51 (0.15, 1.29),<br>0.17                 | 0.55 (0.16, 1.39),<br>0.23                     |
|              | <i>Streptococcus</i> spp.        | 10                 | 0.09<br>(0.04, 0.16)               | 14                  | 0.12<br>(0.07, 0.20)               | 2                  | 0.07<br>(0.01, 0.24)               | 1.34 (0.59, 3.14),<br>0.48                    | 0.81 (0.11, 3.13),<br>0.79                 | 0.60 (0.09, 2.19),<br>0.49                     |
|              | <i>Enterococcus</i> spp.         | 18                 | 0.16<br>(0.09, 0.25)               | 21                  | 0.18<br>(0.11, 0.27)               | 4                  | 0.14<br>(0.04, 0.35)               | 1.12 (0.59, 2.13),<br>0.72                    | 0.88 (0.25, 2.37),<br>0.81                 | 0.78 (0.22, 2.07),<br>0.64                     |
|              | <i>Enterobacteriales</i>         | 50                 | 0.44<br>(0.33, 0.58)               | 45                  | 0.38<br>(0.28, 0.51)               | 15                 | 0.51<br>(0.28, 0.84)               | 0.87 (0.58, 1.30),<br>0.48                    | 1.15 (0.62, 2.01),<br>0.64                 | 1.33 (0.72, 2.34),<br>0.35                     |
|              | Non-fermenting bacteria          | 5                  | 0.04<br>(0.01, 0.10)               | 3                   | 0.03<br>(0.01, 0.07)               | 5                  | 0.17<br>(0.05, 0.39)               | 0.59 (0.11, 2.50),<br>0.47                    | 3.82 (1.03, 14.20),<br>0.05                | 6.49 (1.53, 33.63),<br>0.01                    |
|              | <i>Candida albicans</i>          | 3                  | 0.03<br>(0.01, 0.08)               | 7                   | 0.06<br>(0.02, 0.12)               | 1                  | 0.03<br>(0.00, 0.19)               | 2.18 (0.59, 10.69),<br>0.25                   | 1.39 (0.05, 11.95),<br>0.80                | 0.64 (0.03, 3.67),<br>0.67                     |
|              | Other <i>Candida</i> spp.        | 3                  | 0.03<br>(0.01, 0.08)               | 3                   | 0.03<br>(0.01, 0.07)               | 0                  | 0.00<br>(0.00, 0.12)               | 0.96 (0.17, 5.60),<br>0.96                    | 0 (0, 6.55),<br>0.50                       | 0 (0, 6.81),<br>0.51                           |
|              | Others                           | 17                 | 0.15<br>(0.09, 0.24)               | 17                  | 0.14<br>(0.08, 0.23)               | 12                 | 0.41<br>(0.21, 0.71)               | 0.96 (0.49, 1.91),<br>0.91                    | 2.71 (1.25, 5.66),<br>0.01                 | 2.81 (1.30, 5.88),<br><0.01                    |
| Control      | All                              | 226                | 1.98<br>(1.73, 2.26)               | 297                 | 2.54<br>(2.26, 2.85)               | 59                 | 2.08<br>(1.58, 2.68)               | 1.28 (1.08, 1.53),<br><0.01                   | 1.05 (0.78, 1.39),<br>0.74                 | 0.82 (0.61, 1.07),<br>0.15                     |
|              | Coagulase-negative staphylococci | 36                 | 0.32<br>(0.22, 0.44)               | 53                  | 0.45<br>(0.34, 0.59)               | 9                  | 0.32<br>(0.14, 0.60)               | 1.44 (0.94, 2.21),<br>0.09                    | 1.02 (0.46, 2.03),<br>0.96                 | 0.71 (0.32, 1.37),<br>0.32                     |
|              | <i>Staphylococcus aureus</i>     | 21                 | 0.18<br>(0.11, 0.28)               | 29                  | 0.25<br>(0.17, 0.36)               | 3                  | 0.11<br>(0.02, 0.31)               | 1.35 (0.77, 2.40),<br>0.30                    | 0.60 (0.14, 1.75),<br>0.38                 | 0.45 (0.10, 1.26),<br>0.14                     |
|              | <i>Streptococcus</i> spp.        | 14                 | 0.12<br>(0.07, 0.21)               | 20                  | 0.17<br>(0.10, 0.26)               | 3                  | 0.11<br>(0.02, 0.31)               | 1.39 (0.70, 2.83),<br>0.34                    | 0.90 (0.20, 2.78),<br>0.86                 | 0.64 (0.15, 1.89),<br>0.46                     |
|              | <i>Enterococcus</i> spp.         | 31                 | 0.27<br>(0.18, 0.39)               | 42                  | 0.36<br>(0.26, 0.49)               | 7                  | 0.25<br>(0.10, 0.51)               | 1.32 (0.83, 2.12),<br>0.24                    | 0.92 (0.37, 1.98),<br>0.85                 | 0.70 (0.28, 1.46),<br>0.36                     |
|              | <i>Enterobacteriales</i>         | 66                 | 0.58<br>(0.45, 0.74)               | 85                  | 0.73<br>(0.58, 0.90)               | 15                 | 0.53<br>(0.30, 0.87)               | 1.26 (0.91, 1.74),<br>0.16                    | 0.92 (0.50, 1.57),<br>0.77                 | 0.73 (0.41, 1.23),<br>0.25                     |

|                           |    |                      |    |                      |    |                      |                            |                            |                            |
|---------------------------|----|----------------------|----|----------------------|----|----------------------|----------------------------|----------------------------|----------------------------|
| Non-fermenting bacteria   | 15 | 0.13<br>(0.07, 0.22) | 15 | 0.13<br>(0.07, 0.21) | 1  | 0.04<br>(0.00, 0.20) | 0.98 (0.47, 2.03),<br>0.95 | 0.30 (0.01, 1.50),<br>0.17 | 0.31 (0.01, 1.53),<br>0.18 |
| <i>Candida albicans</i>   | 8  | 0.07<br>(0.03, 0.14) | 7  | 0.06<br>(0.02, 0.12) | 4  | 0.14<br>(0.04, 0.36) | 0.86 (0.30, 2.43),<br>0.77 | 2.05 (0.53, 6.64),<br>0.28 | 2.39 (0.60, 8.11),<br>0.20 |
| Other <i>Candida</i> spp. | 11 | 0.10<br>(0.05, 0.17) | 12 | 0.10<br>(0.05, 0.18) | 3  | 0.11<br>(0.02, 0.31) | 1.06 (0.46, 2.47),<br>0.88 | 1.14 (0.25, 3.70),<br>0.85 | 1.07 (0.23, 3.41),<br>0.92 |
| Others                    | 24 | 0.21<br>(0.13, 0.31) | 34 | 0.29<br>(0.20, 0.41) | 14 | 0.49<br>(0.27, 0.83) | 1.38 (0.82, 2.36),<br>0.22 | 2.35 (1.18, 4.51),<br>0.02 | 1.70 (0.88, 3.12),<br>0.11 |

Abbreviations: IRR – incidence rate ratio; CI95 – 95% confidence interval
